# Supplementary material for: Optimizing the physical properties of collagen/hyaluronan hydrogels by inhibition of polyionic complexes formation at pH close to the collagen isoelectric point
Source: Royal Society of Chemistry journal article supplement (doi:10.1039/d3sm01330h), 2023-01-01
Supplement: d3sm01330h1.pdf [file d3sm01330h1.pdf]

## Electronic Supplementary Information

### Optimizing the physical properties of collagen/hyaluronan hydrogels by inhibition of polyionic complexes formation at pH close to the collagen isoelectric point

Stéphanie De Oliveira <sup>a</sup>, Gregor Miklosic <sup>b</sup>, Joëlle Veziers <sup>c</sup>, Sébastien Grastilleur  
<sup>c</sup>, Thibaud Coradin <sup>a</sup>, Catherine Le Visage<sup>c</sup>, Jérôme Guicheux <sup>c</sup>, Matteo D'Este <sup>b</sup>,  
Christophe Héлары <sup>a\*</sup>

<sup>a</sup> Sorbonne University - Laboratory of Condensed Matter Chemistry of Paris, CNRS, UMR  
7574  
Campus Pierre et Marie Curie, 4 place Jussieu, 75252 Paris Cedex 05, France

<sup>b</sup> AO Research Institute Davos (ARI), Clavadelerstrasse 8, 7270 Davos, Switzerland

<sup>c</sup> Nantes Université, Oniris, INSERM, Regenerative Medicine and Skeleton, RMeS, UMR 1229,  
Faculté d'Odontologie 1 place Alexis Ricordeau 44000 NANTES;

\* Corresponding authors: Christophe Héлары

Email address: [christophe.helary@sorbonne-universite.fr](mailto:christophe.helary@sorbonne-universite.fr)

Telephone: +33144276539

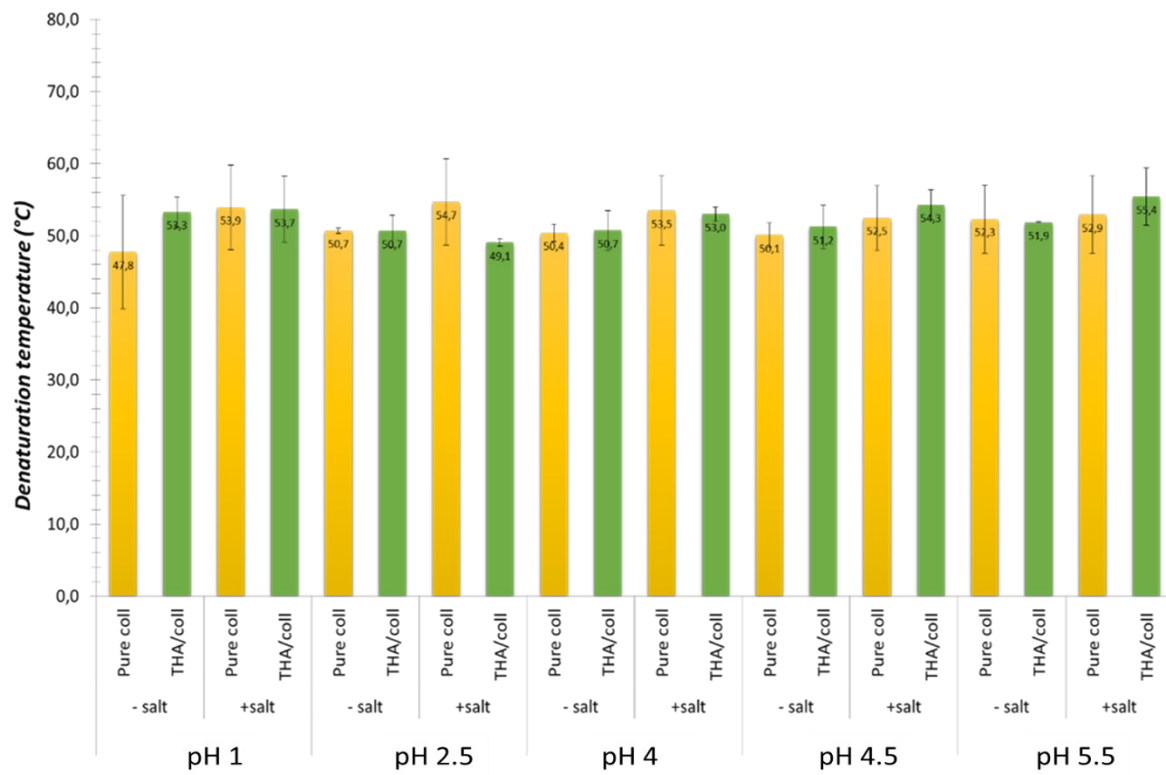

**Electronic Supplementary Information N°1:** Denaturation temperature of collagen in collagen/THA composite hydrogels after collagen gelling and before THA crosslinking.

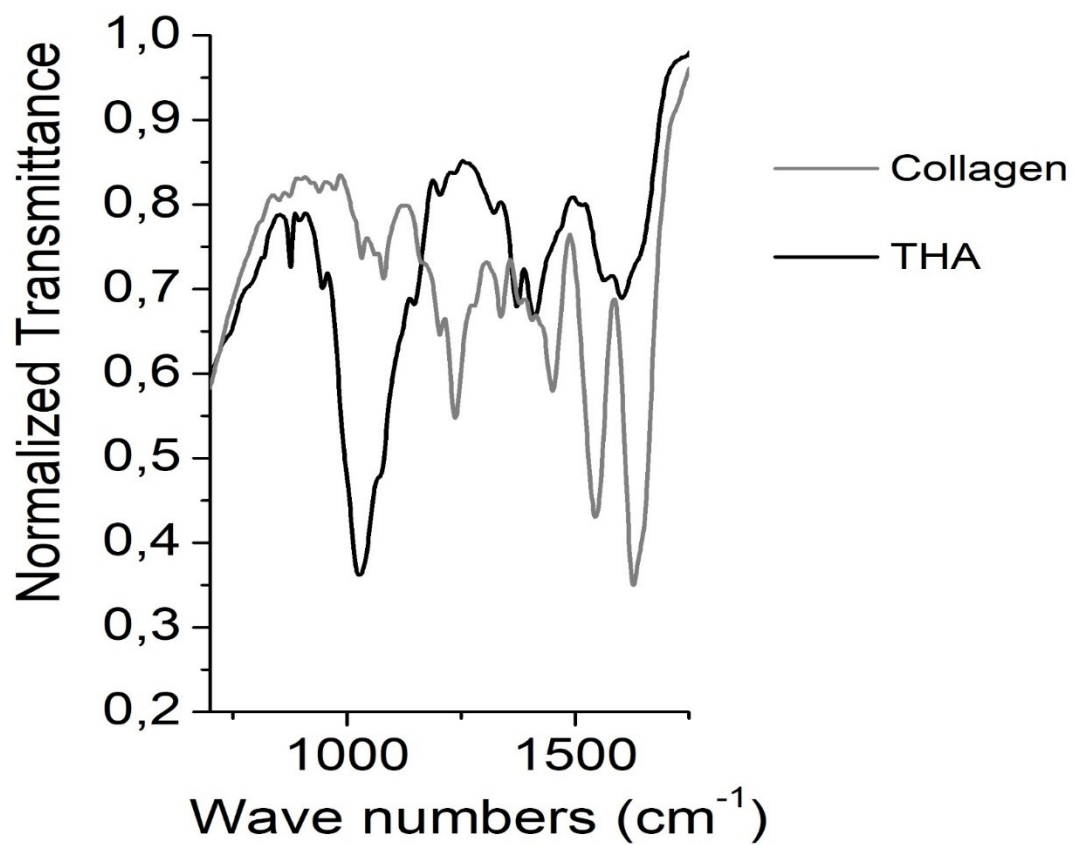

**Electronic Supplementary Information N°2:** ATR-FTIR spectra of pure collagen hydrogel without salt addition and THA powder (zoom in the range from 750 to 1750 cm<sup>-1</sup>).

Without Salt

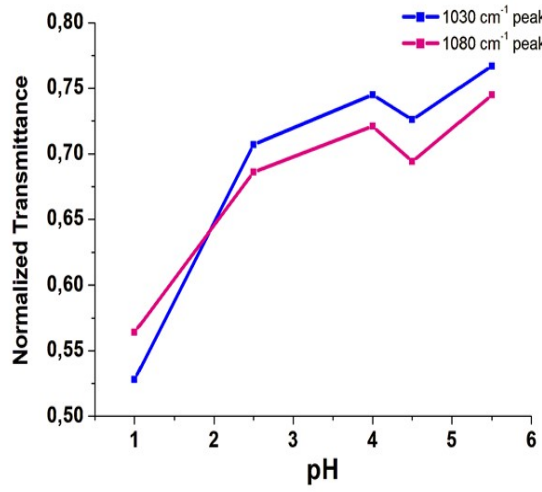

With 400 mM NaCl

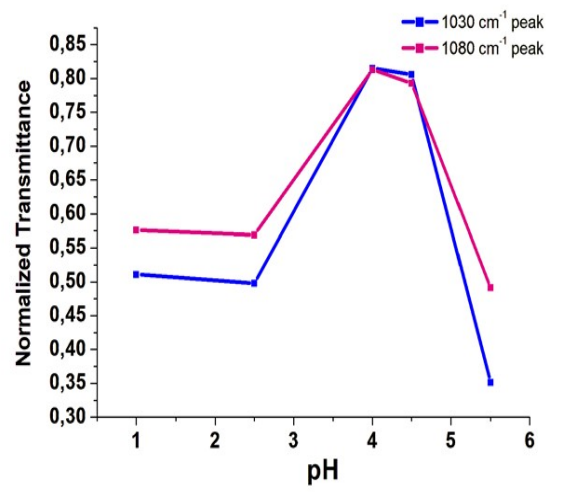

**Electronic Supplementary Information N°3:** Intensity of 1030 and 1080 cm<sup>-1</sup> FTIR bands according to the pH of collagen/THA solutions.
